# Supplementary material
Source: ML conference proceedings conference paper supplement (https://openaccess.thecvf.com/content/CVPR2021/html/Bu_GAIA_A_Transfer_CVPR_2021_paper.html)
Supplement: Supplementary file 1 [file Bu_GAIA_A_Transfer_CVPR_2021_supplemental.pdf]

# Appendices

## A. Details of datasets

We list the information of each dataset in Table A, including number of categories, data scale of training and validation sets, and metrics.

Table A: Details about the different datasets. mAP, mmAP and  $MR^{-2}$  are abbreviations of the mean Average Precision at overlap 0.5, mean mAP over overlap ranging in [0.5, 0.95], and log average Miss Rate over false positives per image ranging in  $[10^{-2}, 10^0]$ .

| Dataset     | Category | Train | Validation | Metric    |
|-------------|----------|-------|------------|-----------|
| Open Images | 500      | 1.7m  | 40k        | mAP       |
| Objects365  | 365      | 600k  | 30k        | mmAP      |
| COCO        | 80       | 115k  | 5k         | mmAP      |
| Caltech     | 1        | 42k   | 3k         | $MR^{-2}$ |
| CityPersons | 1        | 3k    | 0.5k       | $MR^{-2}$ |
| VOC         | 20       | 16k   | 5k         | mAP       |
| WiderFace   | 1        | 13k   | 3k         | mAP       |
| KITTI       | 3        | 4k    | 4k         | mAP       |
| LISA        | 4        | 8k    | 2k         | mAP       |
| DOTA        | 15       | 14k   | 5k         | mAP       |
| Watercolor  | 6        | 1k    | 1k         | mAP       |
| Clipart     | 20       | 0.5k  | 0.5k       | mAP       |
| Comic       | 6        | 1k    | 1k         | mAP       |
| Kitchen     | 11       | 5k    | 2k         | mAP       |
| DeepLesions | 1        | 28k   | 5k         | mAP       |

## B. Rules for architecture selection

As mentioned in the Section 4.2.1 of paper, there are some prescribed rules for architecture selection. We denote the minimum total depth and maximum total depth as  $d_{min}$  and  $d_{max}$ . The depth of model is denoted as  $d$  and we have  $d' = d_{max} - d_{min}$  for simplicity. The pool of rules and respective sampling probability are shown as follow:

- models with  $d = d_{min}, p = \frac{1}{8}$ .
- models of the  $d = d_{min} + 0.25d', p = \frac{1}{8}$ .
- models of the  $d = d_{min} + 0.5d', p = \frac{1}{8}$ .
- models of the  $d = d_{min} + 0.75d', p = \frac{1}{8}$ .
- models of the  $d = d_{max}, p = \frac{1}{8}$ .
- random models,  $p = \frac{3}{8}$ .

## C. Visualization results on each dataset

We visualize the detection results on each dataset, as demonstrated in Figure A.

## D. The adapted architectures to each dataset

We list the selected architecture for each downstream task (Table 5 in paper) in Table B. “†”: In CityPersons dataset, the default input size is  $1024 \times 2048$ , thus we build

our search space of input scale surrounding the default input size with a step of 128 pixels.

Table B: Details about the adapted architectures.

| Dataset      | Scale | Depth      | Width               |
|--------------|-------|------------|---------------------|
| Open Images  | 640   | [4,6,29,4] | [64,80,160,192,640] |
| Objects365   | 720   | [3,4,23,3] | [64,64,128,192,640] |
| COCO         | 720   | [3,4,23,3] | [64,64,128,192,640] |
| Caltech      | 880   | [2,4,17,2] | [48,48,128,256,640] |
| CityPersons† | 1152  | [3,2,4,3]  | [64,64,96,192,384]  |
| VOC          | 640   | [3,4,29,4] | [64,64,128,256,512] |
| WiderFace    | 880   | [4,4,4,2]  | [64,64,96,192,384]  |
| KITTI        | 880   | [3,4,6,3]  | [48,64,96,192,384]  |
| LISA         | 720   | [2,4,17,3] | [64,64,128,192,512] |
| DOTA         | 880   | [4,6,4,2]  | [32,48,96,192,512]  |
| Watercolor   | 640   | [3,2,29,3] | [48,80,96,256,640]  |
| Clipart      | 640   | [3,6,17,3] | [32,64,128,320,640] |
| Comic        | 640   | [2,6,17,2] | [48,64,160,320,512] |
| Kitchen      | 720   | [3,6,23,2] | [48,48,160,192,512] |
| DeepLesions  | 720   | [4,4,17,2] | [32,80,96,256,512]  |

## E. The selected data for each downstream task

Given few images from downstream tasks as query, we show the relevant data collected by GAIA in Figure B. (Table 6 in paper)

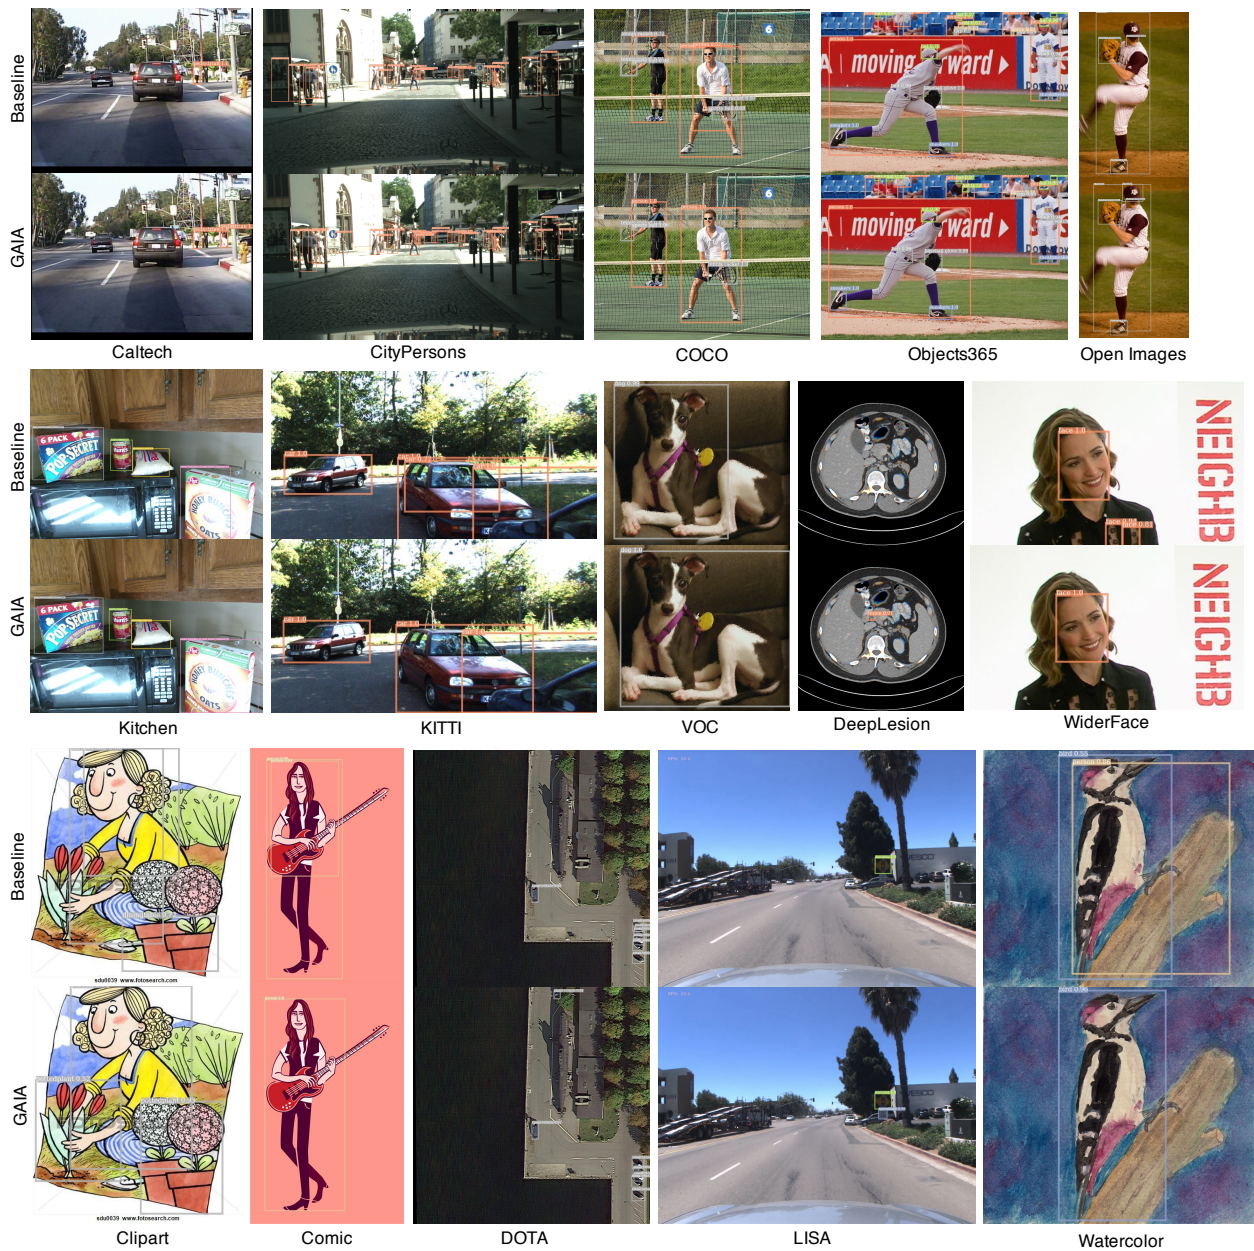

Figure A: Examples of detection results from ImageNet baseline and GAIA on each dataset.



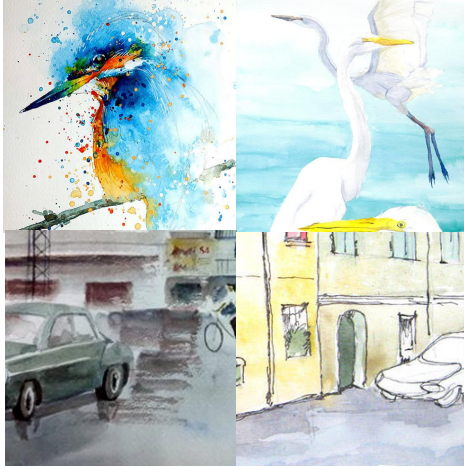

Watercolor

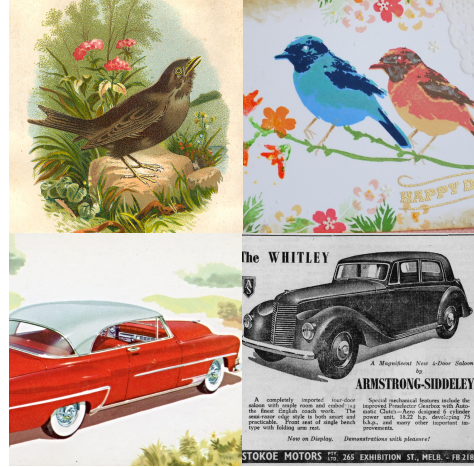

Selected data

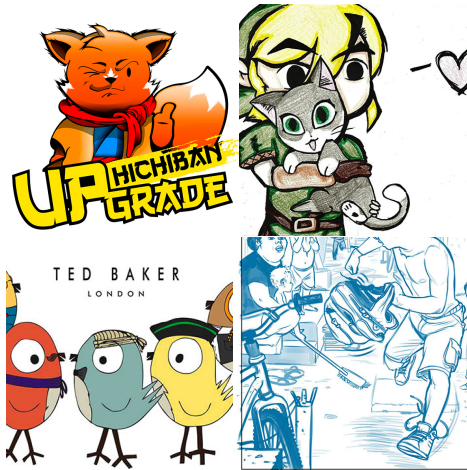

Comic

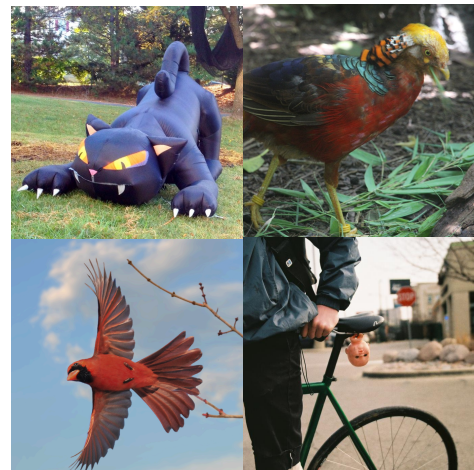

Selected data

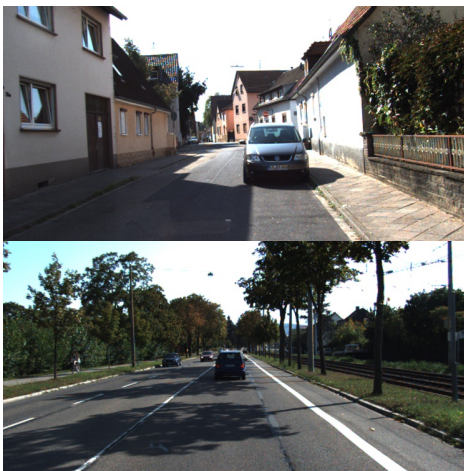

KITTI

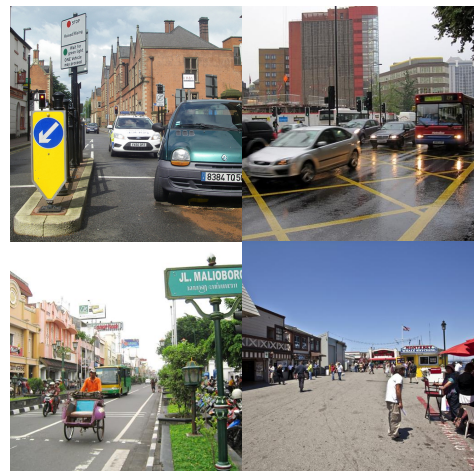

Selected data

Figure B: Examples of data selection results. From top to bottom: Watercolor, Comic, and KITTI. From left to right: downstream tasks data and their corresponding images selected from upstream datasets.
